# Supplementary material for: High Throughput Analysis Reveals Changes in Gut Microbiota and Specific Fecal Metabolomic Signature in Hematopoietic Stem Cell Transplant Patients
Source: MDPI journal article supplement (doi:10.3390/microorganisms9091845), 2021-08-31
Supplement: s1 [file s1]

**Table S1:** Clinical and demographic data of the allo-HSCT patients.

|            | <i>Age</i> | <i>Gender</i> | <i>Primary Disease</i> | <i>GvHD occurrence</i> |
|------------|------------|---------------|------------------------|------------------------|
| <i>P1</i>  | 28         | M             | AML                    | GvHD (acute)           |
| <i>P2</i>  | 12         | M             | ALL                    | GvHD (acute)           |
| <i>P3</i>  | 24         | M             | ALL                    | no-GvHD                |
| <i>P4</i>  | 40         | M             | MA                     | no-GvHD                |
| <i>P5</i>  | 40         | M             | ALL                    | GvHD (acute)           |
| <i>P6</i>  | 17         | M             | ALL                    | no-GvHD                |
| <i>P7</i>  | 24         | M             | MA                     | no-GvHD                |
| <i>P8</i>  | 41         | M             | AML                    | no-GvHD                |
| <i>P9</i>  | 14         | M             | MA                     | no-GvHD                |
| <i>P10</i> | 23         | F             | MA                     | no-GvHD                |
| <i>P11</i> | 32         | F             | AML                    | no-GvHD                |
| <i>P12</i> | 42         | F             | ALL                    | no-GvHD                |
| <i>P13</i> | 41         | M             | AML                    | GvHD (acute)           |
| <i>P14</i> | 42         | M             | AML                    | no-GvHD                |
| <i>P15</i> | 22         | F             | ALL                    | no-GvHD                |
| <i>C1</i>  | 24         | F             | NA                     | NA                     |
| <i>C2</i>  | 24         | F             | NA                     | NA                     |
| <i>C3</i>  | 24         | F             | NA                     | NA                     |
| <i>C4</i>  | 24         | F             | NA                     | NA                     |
| <i>C5</i>  | 18         | M             | NA                     | NA                     |
| <i>C6</i>  | 25         | F             | NA                     | NA                     |
| <i>C7</i>  | 18         | F             | NA                     | NA                     |
| <i>C8</i>  | 30         | F             | NA                     | NA                     |
| <i>C9</i>  | 30         | F             | NA                     | NA                     |
| <i>C10</i> | 35         | F             | NA                     | NA                     |
| <i>C11</i> | 62         | M             | NA                     | NA                     |
| <i>C12</i> | 30         | M             | NA                     | NA                     |
| <i>C13</i> | 50         | M             | NA                     | NA                     |
| <i>C14</i> | 42         | M             | NA                     | NA                     |
| <i>C15</i> | 35         | M             | NA                     | NA                     |
| <i>C16</i> | 32         | M             | NA                     | NA                     |
| <i>C17</i> | 31         | M             | NA                     | NA                     |
| <i>C18</i> | 62         | M             | NA                     | NA                     |

**AML:** Acute Myeloid Leukemia; **ALL:** Acute Lymphocytic Leukemia **AM:** Medullar Aplasia;

**Table S2:** Alpha diversity indexes of fecal samples of allo-HSCT recipients

|            | <i>Number of Reads</i> | <i>OTU number</i> | <i>Richness</i>          | <i>Simpson</i>          | <i>Shannon</i>         | <i>Pielous evenness</i> |
|------------|------------------------|-------------------|--------------------------|-------------------------|------------------------|-------------------------|
| <b>P1</b>  | 69056                  | 97.11±3.86        | 16.53±0.33 <sup>a</sup>  | 0.79±0.002 <sup>a</sup> | 1.95±0.01 <sup>a</sup> | 0.69±0.004 <sup>a</sup> |
| <b>P2</b>  | 50352                  | 84.33±1.63        | 23.77±3.71 <sup>a</sup>  | 0.84±0.02 <sup>b</sup>  | 2.20±0.06 <sup>b</sup> | 0.69±0.03 <sup>a</sup>  |
| <b>P3</b>  | 47901                  | 67.66±0.19        | 18.03±3.21 <sup>b</sup>  | 0.79±0.01 <sup>b</sup>  | 1.93±0.05 <sup>c</sup> | 0.65±0.01 <sup>a</sup>  |
| <b>P4</b>  | 20924                  | 48.1±3.46         | 30.59±4.06 <sup>c</sup>  | 0.64±0.01 <sup>c</sup>  | 1.31±0.04 <sup>b</sup> | 0.51±0.01 <sup>b</sup>  |
| <b>P5</b>  | 24044                  | 47.83±4.26        | 34.96±6.01 <sup>a</sup>  | 0.62±0.01 <sup>a</sup>  | 1.37±0.1 <sup>c</sup>  | 0.49±0.006 <sup>a</sup> |
| <b>P6</b>  | 19427                  | 53.14±1.66        | 30.99±7.14 <sup>d</sup>  | 0.61±0.009 <sup>a</sup> | 1.26±0.06 <sup>d</sup> | 0.43±0.04 <sup>b</sup>  |
| <b>P7</b>  | 18754                  | 60.67±7.05        | 17.97±2.29 <sup>d</sup>  | 0.71±0.003 <sup>a</sup> | 1.69±0.03 <sup>d</sup> | 0.60±0.01 <sup>b</sup>  |
| <b>P8</b>  | 31440                  | 56.41±15.62       | 17.99±3.05 <sup>d</sup>  | 0.74±0.01 <sup>b</sup>  | 1.78±0.07 <sup>c</sup> | 0.64±0.02 <sup>b</sup>  |
| <b>P9</b>  | 12788                  | 48.34±0.56        | 11.89±4.02 <sup>d</sup>  | 0.66±0.1 <sup>d</sup>   | 1.67±0.23 <sup>e</sup> | 0.55±0.06 <sup>c</sup>  |
| <b>P10</b> | 19126                  | 47.02±1.88        | 12.79±4.14 <sup>a</sup>  | 0.90±0.01 <sup>b</sup>  | 2.69±0.03 <sup>b</sup> | 0.78±0.02 <sup>b</sup>  |
| <b>P11</b> | 13252                  | 50.44±8.84        | 15.99±0.87 <sup>d</sup>  | 0.57±0.01 <sup>b</sup>  | 0.95±0.03 <sup>d</sup> | 0.86±0.01 <sup>b</sup>  |
| <b>P12</b> | 11854                  | 50.21±2.52        | 17.99±5.36 <sup>d</sup>  | 0.90±0.01 <sup>b</sup>  | 2.49±0.09 <sup>c</sup> | 0.84±0.01 <sup>a</sup>  |
| <b>P13</b> | 13097                  | 52.69±2.27        | 15.77±5.4 <sup>a</sup>   | 0.47±0.02 <sup>c</sup>  | 0.12±0.04 <sup>b</sup> | 0.06±0.01 <sup>b</sup>  |
| <b>P14</b> | 20937                  | 67.7±3.05         | 15.99±2.3 <sup>a</sup>   | 0.23±0.01 <sup>b</sup>  | 0.51±0.09 <sup>b</sup> | 0.19±0.03 <sup>b</sup>  |
| <b>P15</b> | 11072                  | 54.09±5.27        | 19.94±11.49 <sup>d</sup> | 0.75±0.01 <sup>b</sup>  | 1.71±0.04 <sup>c</sup> | 0.53±0.06 <sup>a</sup>  |
| <b>C1</b>  | 35517                  | 278.76±5.01       | 66.92±3.6 <sup>d</sup>   | 0.72±0.06 <sup>c</sup>  | 2.18±0.34 <sup>d</sup> | 0.52±0.08 <sup>b</sup>  |
| <b>C2</b>  | 22288                  | 299.5±1.6         | 60.58±6.32 <sup>d</sup>  | 0.84±0.04 <sup>a</sup>  | 2.63±0.21 <sup>d</sup> | 0.64±0.05 <sup>b</sup>  |
| <b>C3</b>  | 44927                  | 300.63±8.94       | 55.63±1.84 <sup>d</sup>  | 0.87±0.02 <sup>c</sup>  | 2.56±0.11 <sup>d</sup> | 0.64±0.02 <sup>b</sup>  |
| <b>C4</b>  | 57465                  | 292.84±5.03       | 64.39±2.1 <sup>d</sup>   | 0.75±0.06 <sup>c</sup>  | 2.22±0.19 <sup>c</sup> | 0.53±0.05 <sup>b</sup>  |
| <b>C5</b>  | 36469                  | 280.92±7.34       | 61.62±1.76 <sup>d</sup>  | 0.91±0.02 <sup>b</sup>  | 2.96±0.14 <sup>c</sup> | 0.72±0.03 <sup>b</sup>  |
| <b>C6</b>  | 36012                  | 301.47±2.56       | 70.85±0.54 <sup>b</sup>  | 0.91±0.02 <sup>a</sup>  | 2.97±0.1 <sup>c</sup>  | 0.7±0.02 <sup>b</sup>   |
| <b>C7</b>  | 31802                  | 306.7±9.72        | 56.3±0.3 <sup>d</sup>    | 0.93±0 <sup>b</sup>     | 3.07±0.04 <sup>c</sup> | 0.76±0.01 <sup>a</sup>  |
| <b>C8</b>  | 42430                  | 304.58±7.41       | 67.97±1.3 <sup>d</sup>   | 0.93±0.01 <sup>b</sup>  | 3.14±0.07 <sup>c</sup> | 0.74±0.01 <sup>b</sup>  |
| <b>C9</b>  | 27857                  | 265.94±2.54       | 62.65±2.73 <sup>b</sup>  | 0.94±0 <sup>a</sup>     | 3.22±0.02 <sup>a</sup> | 0.78±0.01 <sup>a</sup>  |
| <b>C10</b> | 59253                  | 253.01±3.7        | 55.18±1.59 <sup>d</sup>  | 0.9±0.01 <sup>a</sup>   | 2.77±0.16 <sup>c</sup> | 0.69±0.04 <sup>b</sup>  |
| <b>C11</b> | 37700                  | 268.99±0.78       | 57.3±1.76 <sup>d</sup>   | 0.91±0.01 <sup>a</sup>  | 2.86±0.06 <sup>c</sup> | 0.71±0.01 <sup>b</sup>  |
| <b>C12</b> | 11777                  | 278.03±7.11       | 63±2.52 <sup>d</sup>     | 0.92±0 <sup>b</sup>     | 3.09±0.03 <sup>b</sup> | 0.75±0.01 <sup>a</sup>  |
| <b>C13</b> | 23497                  | 318.02±16.37      | 57.57±11.4 <sup>d</sup>  | 0.73±0.1 <sup>c</sup>   | 2.1±0.38 <sup>a</sup>  | 0.52±0.07 <sup>b</sup>  |
| <b>C14</b> | 35906                  | 263.91±2.93       | 75±0.58 <sup>d</sup>     | 0.93±0.01 <sup>b</sup>  | 3.24±0.07 <sup>d</sup> | 0.75±0.02 <sup>a</sup>  |
| <b>C15</b> | 28352                  | 312.86±2.96       | 52.72±1.88 <sup>a</sup>  | 0.75±0.01 <sup>c</sup>  | 1.89±0.03 <sup>b</sup> | 0.48±0.01 <sup>b</sup>  |
| <b>C16</b> | 40189                  | 293.44±1.64       | 69.49±1.95 <sup>b</sup>  | 0.89±0.01 <sup>b</sup>  | 2.86±0.05 <sup>c</sup> | 0.67±0.01 <sup>b</sup>  |
| <b>C17</b> | 12749                  | 334.26±12.34      | 37.24±2.71 <sup>a</sup>  | 0.56±0.06 <sup>b</sup>  | 1.49±0.21 <sup>b</sup> | 0.41±0.05 <sup>b</sup>  |
| <b>C18</b> | 24558                  | 331.07±12.22      | 52.22±9.76 <sup>a</sup>  | 0.65±0.1 <sup>c</sup>   | 1.67±0.32 <sup>b</sup> | 0.42±0.06 <sup>b</sup>  |

**Table S3.** Mean relative abundances of the seven most abundant bacteria at genus level present in the faecal specimens of 15 allo-HSCT patients and 18 control subjects.

| Genera                      | Relative abundance<br>(Mean $\pm$ SE) |                  |
|-----------------------------|---------------------------------------|------------------|
|                             | Control                               | HSCT             |
| <i>Alistipes</i>            | 4.93 $\pm$ 1.06                       | 0.88 $\pm$ 0.29  |
| <i>Akkermansia</i>          | 1.43 $\pm$ 0.57                       | 4.90 $\pm$ 2.53  |
| <i>Faecalibacterium</i>     | 7.82 $\pm$ 1.01                       | 1.67 $\pm$ 0.59  |
| <i>Klebsiella</i>           | 0.26 $\pm$ 0.14                       | 10.87 $\pm$ 3.86 |
| <i>Prevotella.9</i>         | 21.80 $\pm$ 3.71                      | 0.19 $\pm$ 0.13  |
| <i>Escherichia.Shigella</i> | 0.15 $\pm$ 0.15                       | 22.09 $\pm$ 3.46 |
| <i>Bacteroides</i>          | 23.41 $\pm$ 2.12                      | 37.76 $\pm$ 3.87 |

**Table S4.** Mean relative abundances of the eight most abundant bacteria at genus level present in faecal specimens of allo-HSCT recipients suffering or not from graft versus host disease: (GvH; n=4, no GvH; n=11).

| Genera                      |                  | HSCT             |                   |
|-----------------------------|------------------|------------------|-------------------|
|                             | Control          | no GvH           | GvH               |
| <i>Alistipes</i>            | 4.93 $\pm$ 1.06  | 1.00 $\pm$ 0.36  | 0.70 $\pm$ 0.15   |
| <i>Veillonella</i>          | 0.09 $\pm$ 0.08  | 4.86 $\pm$ 1.14  | 3.27 $\pm$ 0.49   |
| <i>Akkermansia</i>          | 1.43 $\pm$ 0.57  | 7.84 $\pm$ 3.17  | 0                 |
| <i>Faecalibacterium</i>     | 7.82 $\pm$ 1.01  | 2.58 $\pm$ 0.72  | 0.17 $\pm$ 0.03   |
| <i>Klebsiella</i>           | 0.26 $\pm$ 0.14  | 16.96 $\pm$ 4.75 | 0.72 $\pm$ 0.29   |
| <i>Prevotella.9</i>         | 21.80 $\pm$ 3.71 | 0.31 $\pm$ 0.16  | 0.003 $\pm$ 0.001 |
| <i>Escherichia.Shigella</i> | 0.15 $\pm$ 0.15  | 20.71 $\pm$ 3.94 | 24.37 $\pm$ 2.66  |
| <i>Bacteroides</i>          | 23.41 $\pm$ 2.82 | 30.63 $\pm$ 3.99 | 49.65 $\pm$ 3.25  |

**Table S5.** Topological properties of networks in fecal communities of healthy, and allo-HSCT transplant samples with and without GvH disease.

| Sandstorm | Nodes | Edges        |                    |          | Clustering coefficient |
|-----------|-------|--------------|--------------------|----------|------------------------|
|           |       | Co-presence* | Mutual exclusion** | Total*** |                        |
| Control   | 194   | 599          | 816                | 1415     | 0.270                  |
| GvH       | 90    | 969          | 916                | 1885     | 0.667                  |
| No-GvH    | 83    | 801          | 615                | 1416     | 0.487                  |

\* Number of positive interactions (Co-presence / Co-occurrence)

\*\* Number of negative interaction (Mutual exclusion)

\*\*\* Total number of edges

**Table S6.** Summary of the detected metabolites in the feces of allo-HSCT and CT group

| Sub-classes      | Chemical classes      | Metabolites                                               | m/z                     | Chemical Structure                                                       |
|------------------|-----------------------|-----------------------------------------------------------|-------------------------|--------------------------------------------------------------------------|
| Aldehydes        | Medium-chain aldehyde | 4-Oxononanal                                              | 43/85/71                | MF : C <sub>9</sub> H <sub>16</sub> O <sub>2</sub><br>MW: 156.22 g/mol   |
| Benzenoids       | Benzenoids            | Benzoic acid                                              | 105/77/135              | MF : C <sub>7</sub> H <sub>6</sub> O <sub>2</sub><br>MW: 122.12 g/mol    |
|                  | Benzenoids            | P,P-Dioctyldiphenylamine                                  | 322/323/250             | MF : C <sub>28</sub> H <sub>43</sub> N<br>MW: 393.6 g/mol                |
|                  | Benzenoids            | Mesitylene                                                | 105.99/<br>120.86/77.98 | MF : C <sub>9</sub> H <sub>12</sub><br>MW: 120.19 g/mol                  |
|                  | Phenylpropanes        | 2,4-Di-tert-butylphenol                                   | 191.99/57.32/41.16      | MF : C <sub>14</sub> H <sub>22</sub> O<br>MW : 206.17 g/mol              |
|                  | Phenylpropanes        | 7,9-Di-tert-butyl-1-oxaspiro[4,5]deca-6,9-diene-2,8-dione | 57/205/55               | MF : C <sub>17</sub> H <sub>24</sub> O <sub>3</sub><br>MW : 276.4 g/mol  |
|                  | Phenylpropanes        |                                                           |                         | MF : C <sub>17</sub> H <sub>24</sub> O <sub>3</sub><br>MW : 276.4 g/mol  |
| Carboxylic acids | Carboxylic acids      | 5beta-Cholestanone                                        | 372.33/43/301           | MF : C <sub>27</sub> H <sub>46</sub> O<br>MW : 386.7 g/mol               |
|                  | Monocarboxylic acid   | 2-Propenoic acid, tridecyl ester                          | 55/43/41                | MF : C <sub>16</sub> H <sub>30</sub> O <sub>2</sub><br>MW : 254.41 g/mol |
|                  | Monocarboxylic acid   | Acetic acid                                               | 43/45/60                | MF : C <sub>2</sub> H <sub>4</sub> O <sub>2</sub><br>MW : 60.05 g/mol    |
|                  | Tricarboxylic acids   | Triethyl citrate                                          | 157/ 203/115            | MF : C <sub>12</sub> H <sub>20</sub> O <sub>7</sub>                      |
|                  | Tricarboxylic acids   |                                                           |                         |                                                                          |

|                   |                   |                                                           |                          |                                                                                          |
|-------------------|-------------------|-----------------------------------------------------------|--------------------------|------------------------------------------------------------------------------------------|
|                   |                   |                                                           |                          | MW : 276.28<br>g/mol                                                                     |
| Dicarboxylic acid | Dicarboxylic acid | Succinic acid                                             | 72/55/57                 | MF : C <sub>4</sub> H <sub>6</sub> O <sub>4</sub><br>MW : 118.09<br>g/mol                |
|                   |                   | Glutaric acid, 3-methylbut-2-enyl<br>pentyl ester         | 115/69/68                | MF : C <sub>15</sub> H <sub>26</sub> O <sub>4</sub><br>MW : 270.36<br>g/mol              |
|                   |                   | Oxalic acid                                               | 73/91/55                 | MF : C <sub>2</sub> H <sub>2</sub> O <sub>4</sub><br>MW : 90.03<br>g/mol                 |
|                   |                   | Fumaric acid                                              | 115/97/83                | MF : C <sub>4</sub> H <sub>4</sub> O <sub>4</sub><br>MW : 116.07<br>g/mol                |
|                   |                   | Malonic acid                                              | 59/103/42                | MF : C <sub>3</sub> H <sub>4</sub> O <sub>4</sub><br>MW : 104.06<br>g/mol                |
| Diamine           | Diazines          | Thymine glycol                                            | 46/89/43                 | MF : C <sub>5</sub> H <sub>8</sub> N <sub>2</sub> O <sub>4</sub><br>MW : 160.13<br>g/mol |
| Food additive     | Food additive     | 2,2'-Bi-1,3-dioxolane,<br>4,4,4',4',5,5,5',5'-octamethyl- | 129/83/101               | MF : C <sub>14</sub> H <sub>26</sub> O <sub>4</sub><br>MW : 258.35<br>g/mol              |
| Furans            | Furans            | 2,5-Furandicarboxylic acid                                | 156/139/39               | MF : C <sub>6</sub> H <sub>4</sub> O <sub>5</sub><br>MW : 156.09<br>g/mol                |
| Hydrocarbons      |                   | Nonadecane                                                | 57.99 / 43.82 /<br>71.66 | MF : C <sub>19</sub> H <sub>40</sub><br>MW : 268.5<br>g/mol                              |
|                   |                   | Tritetracontane                                           | 57.99 / 71.64<br>/43.47  | MF : C <sub>43</sub> H <sub>88</sub><br>MW : 605.2<br>g/mol                              |
|                   |                   | Eicosane                                                  | 55.99/57.77/43.69        | MF : C <sub>20</sub> H <sub>40</sub><br>MW : 280.31<br>g/mol                             |
|                   |                   | Hexadecane                                                | 85/99/113                | MF : C <sub>16</sub> H <sub>34</sub><br>MW : 226.44<br>g/mol                             |
|                   |                   | Octadecane                                                | 57/43/71                 | MF : C <sub>18</sub> H <sub>38</sub><br>MW : 254.5<br>g/mol                              |
|                   |                   | Heptadecane                                               | 57.99 / 43.65 /<br>71.64 | MF : C <sub>17</sub> H <sub>36</sub><br>MW : 240.5<br>g/mol                              |
|                   |                   | cis-9-Tricosene                                           | 55/97/83                 | MF : C <sub>23</sub> H <sub>46</sub><br>MW : 322.6<br>g/mol                              |
|                   | Alkanes           |                                                           |                          | MF : C <sub>29</sub> H <sub>58</sub><br>MW : 406.45<br>g/mol                             |
|                   | Alkenes           | 1-Nonacosene                                              | 57.99/43.95/55.91        | MF : C <sub>23</sub> H <sub>44</sub> O <sub>3</sub>                                      |
|                   | Hydrocarbons      | Carbonic acid, eicosyl vinyl ester                        | 57/71/85                 |                                                                                          |

|         |                                      |                                   |                         |                                                                                 |
|---------|--------------------------------------|-----------------------------------|-------------------------|---------------------------------------------------------------------------------|
|         |                                      |                                   |                         | MW : 368.6<br>g/mol                                                             |
|         | Unsaturated aliphatic<br>hydrocarbon | 1-Pentadecene                     | 97/111/83               | MF : C <sub>15</sub> H <sub>30</sub><br><br>MW : 210.4<br>g/mol                 |
| Indoles | Indoles                              | Indole                            | 117.05/89.02/101.<br>03 | MF : C <sub>8</sub> H <sub>7</sub> N<br><br>MW : 117.15<br>g/mol                |
|         |                                      | Indole-3-methyl acetate           | 130/189/131             | MF: C <sub>11</sub> H <sub>11</sub> NO <sub>2</sub><br><br>MW : 189.21<br>g/mol |
| Ketones | Ketones                              | 2-Tridecanone                     | 58/43/71                | MF : C <sub>13</sub> H <sub>26</sub> O<br><br>MW : 198.34<br>g/mol              |
| Lipids  | iso-fatty acids                      | Methyl 13-methyltetradecanoate    | 75/87.65/55.24          | MF : C <sub>16</sub> H <sub>32</sub> O <sub>2</sub><br><br>MW : 256.24<br>g/mol |
|         | Long-chain fatty acid                | 17-Octadecynoic acid              | 55/81/67                | MF : C <sub>18</sub> H <sub>32</sub> O <sub>2</sub><br><br>MW : 280.4<br>g/mol  |
|         |                                      | 12-Methyltridecanoic acid         | 74.99/87.69/43.47       | MF: C <sub>15</sub> H <sub>30</sub> O <sub>2</sub><br><br>MW: 242.25<br>g/mol   |
|         |                                      | Oleic acid, methyl ester          | 55.99/69.66/74.54       | MF: C <sub>19</sub> H <sub>36</sub> O <sub>2</sub><br><br>MW: 296.27<br>g/mol   |
|         |                                      | 16-Methylheptadecanoic acid       | 74.99/87.76/75.23       | MF: C <sub>19</sub> H <sub>38</sub> O <sub>2</sub><br><br>MW: 298.29<br>g/mol   |
|         |                                      | Palmitoleic acid                  | 237/219/171             | MF : C <sub>16</sub> H <sub>30</sub> O <sub>2</sub><br><br>MW : 254.41<br>g/mol |
|         |                                      | 17-Methyloctadecanoic acid        | 73/43/89                | MF : C <sub>19</sub> H <sub>38</sub> O <sub>2</sub><br><br>MW : 298.5<br>g/mol  |
|         |                                      | Z-8-Methyl-9-tetradecenoic acid   | 55/41/43                | MF : C <sub>15</sub> H <sub>28</sub> O <sub>2</sub><br><br>MW : 240.38<br>g/mol |
|         |                                      | Tetracosanoic acid                | 117/129/132             | MF : C <sub>24</sub> H <sub>48</sub> O <sub>2</sub><br><br>MW : 368.6<br>g/mol  |
|         | Phytosterols                         | beta-Sitosterol                   | 43.99/ 55.35/41.33      | MF : C <sub>29</sub> H <sub>50</sub> O<br><br>MW: 414.39<br>g/mol               |
|         |                                      | Stigmasterol                      | 55.99/83.69/81.64       | MF : C <sub>29</sub> H <sub>48</sub> O<br><br>MW: 412.37<br>g/mol               |
|         |                                      | Campesterol                       | 43.99/55.62/41.47       | MF: C <sub>28</sub> H <sub>48</sub> O<br><br>MW: 400.37<br>g/mol                |
|         |                                      | Cholesta-4,6-dien-3-ol, (3.beta.) | 43.99/143.7/135.6<br>3  | MF: C <sub>27</sub> H <sub>44</sub> O                                           |
|         | Sterol                               |                                   |                         |                                                                                 |

|  |                          |                                    |                     |                                                     |
|--|--------------------------|------------------------------------|---------------------|-----------------------------------------------------|
|  |                          |                                    |                     | MW: 384.34<br>g/mol                                 |
|  |                          |                                    | 43.99/55.89/57.74   | MF : C <sub>27</sub> H <sub>46</sub> O              |
|  |                          | Cholesterol                        |                     | MW: 386.35<br>g/mol                                 |
|  |                          | Lathosterol                        | 43.99/386.89/255.73 | MF : C <sub>27</sub> H <sub>46</sub> O              |
|  |                          |                                    |                     | MW: 386.36<br>g/mol                                 |
|  |                          |                                    |                     | MF : C <sub>27</sub> H <sub>46</sub> O              |
|  |                          | Cholest-5-en-3-ol                  | 43/386/57           | MW: 386.7<br>g/mol                                  |
|  | Steroid esters           | Cholesterol Myristate              | 43/57/81            | MF : C <sub>41</sub> H <sub>72</sub> O <sub>2</sub> |
|  |                          |                                    |                     | MW: 597 g/mol                                       |
|  | steroid derivative       | Stigmastanol                       | 43.99/107.72/215.7  | MF : C <sub>29</sub> H <sub>52</sub> O              |
|  |                          |                                    |                     | MW: 416.4<br>g/mol                                  |
|  | Stigmastanes             | Clionasterol                       | 43.99/55.67/57.56   | MF : C <sub>29</sub> H <sub>50</sub> O              |
|  |                          |                                    |                     | MW: 414.39<br>g/mol                                 |
|  | Cholestane steroids      |                                    |                     | MF : C <sub>27</sub> H <sub>48</sub> O              |
|  |                          | Coprostanol                        | 43.99/55.94/215.87  | MW: 388.37<br>g/mol                                 |
|  |                          |                                    | 124/43/55           | MF : C <sub>27</sub> H <sub>44</sub> O              |
|  |                          | Cholestenone                       |                     | MW: 384.6<br>g/mol                                  |
|  | Ergostane steroids       | Ergosterol                         | 142/118/80          | MF : C <sub>28</sub> H <sub>44</sub> O              |
|  |                          |                                    |                     | MW: 396.6<br>g/mol                                  |
|  | Fatty acid methyl esters |                                    |                     | MF : C <sub>17</sub> H <sub>34</sub> O <sub>2</sub> |
|  |                          | methyl palmitate                   | 75/87.72/43.325     | MW : 270.256<br>g/mol                               |
|  |                          |                                    |                     | MF : C <sub>19</sub> H <sub>36</sub> O <sub>2</sub> |
|  |                          | 13-Octadecenoic acid, methyl ester | 55.99/41.63/69.54   | MW : 296.27<br>g/mol                                |
|  | Fatty acid esters        |                                    |                     | MF : C <sub>11</sub> H <sub>20</sub> O <sub>2</sub> |
|  |                          | 2-Hexenyl valerate                 | 85/57/41            | MW : 184.27<br>g/mol                                |
|  |                          |                                    |                     | MF : C <sub>10</sub> H <sub>12</sub> O <sub>2</sub> |
|  |                          | Methyl 3-phenylpropanoate          | 104/91/105          | MW : 164.2<br>g/mol                                 |
|  |                          |                                    | 43.99/55.68/69.67   | MF : C <sub>20</sub> H <sub>38</sub> O <sub>2</sub> |
|  |                          | Ethyl Oleate                       |                     | MW : 310.29<br>g/mol                                |
|  |                          |                                    | 129/371/259         | MF: C <sub>22</sub> H <sub>42</sub> O <sub>4</sub>  |
|  |                          | Diethylhexyl adipate               |                     | MW: 370.6<br>g/mol                                  |
|  | Fatty alcohol            |                                    |                     | MF: C <sub>16</sub> H <sub>34</sub> O               |
|  |                          | Cetyl alcohol                      | 56/69/83            | MW: 242.26<br>g/mol                                 |
|  |                          |                                    |                     | MF: C <sub>8</sub> H <sub>16</sub> O                |
|  |                          | (Z)-5-Octen-1-ol                   | 67/41/68            | MW: 128.21<br>g/mol                                 |

|              |                      |                                                          |                            |                                                                         |
|--------------|----------------------|----------------------------------------------------------|----------------------------|-------------------------------------------------------------------------|
|              | Fatty alcohol esters | Lauryl fluoroacetate                                     | 69/55/83                   | MF: C <sub>14</sub> H <sub>27</sub> FO <sub>2</sub><br>MW: 246.36 g/mol |
|              |                      | cis-5-Decen-1-yl acetate                                 | 43/81/67                   | MF: C <sub>12</sub> H <sub>22</sub> O <sub>2</sub><br>MW: 198.3 g/mol   |
| Naphthalenes | Naphthalenes         | 1,4-Naphthoquinone                                       | 217.99/232.91/189.44/43.27 | MF : C <sub>12</sub> H <sub>8</sub> O <sub>5</sub><br>MW : 232.04 g/mol |
| Other        | Unknown              | Isobutyl 2-methylpentyl carbonate                        | 57/84/85                   | MF: C <sub>11</sub> H <sub>22</sub> O <sub>3</sub><br>MW: 202.29 g/mol  |
|              |                      | 3,9-Diethyl-6-tridecanol                                 | 69/83/55                   | MF: C <sub>17</sub> H <sub>36</sub> O<br>MW: 256.5 g/mol                |
|              |                      | Methyl 7,11,14-eicosatrienoate                           | 68/81.67/79.59             | MF: C <sub>21</sub> H <sub>36</sub> O <sub>2</sub><br>MW: 320.27 g/mol  |
|              |                      | Ethyl 9,12-hexadecadienoate                              | 67/81/55                   | MF : C <sub>18</sub> H <sub>32</sub> O <sub>2</sub><br>MW : 280.4 g/mol |
|              |                      |                                                          |                            |                                                                         |
| Phenols      | Phenols              | m-Cresol                                                 | 108.99/107.95/79.35        | MF : C <sub>7</sub> H <sub>8</sub> O<br>MW : 108.06 g/mol               |
|              |                      | 2-Methoxy-4-vinylphenol                                  | 150/135/107                | MF: C <sub>9</sub> H <sub>10</sub> O <sub>2</sub><br>MW: 150.17 g/mol   |
| Terpenoids   | Monoterpenoids       | Camphor                                                  | 95/69/55                   | MF: C <sub>10</sub> H <sub>16</sub> O<br>MW: 152.23 g/mol               |
|              | Terpenoids           | 1,2-Epoxy-1,2,7,7',8,8',11,12-octahydro-psi,psi-carotene | 544/473/69                 | MF: C <sub>40</sub> H <sub>64</sub> O<br>MW: 560.9 g/mol                |
|              | Carotenoid           | Squalene                                                 | 69.06/81.06/41.03          | MF : C <sub>30</sub> H <sub>50</sub><br>MW: 410.7 g/mol                 |
|              | Diterpenoid          | Phytol                                                   | 143/73/75                  | MF: C <sub>20</sub> H <sub>40</sub> O<br>MW: 296.5 g/mol                |
| Vitamins     | Tocopherols          | Gamma-Tocopherol                                         | 151.99/416.72/417.21       | MF :C <sub>28</sub> H <sub>48</sub> O <sub>2</sub><br>MW : 416.37 g/mol |
|              |                      | Vitamin E                                                | 165.99/430.79/164.31       | MF :C <sub>29</sub> H <sub>50</sub> O <sub>2</sub><br>MW : 430.38 g/mol |

**MF:** Molecular Formula, **MW:** Molecular weight



**Table S7.** Biomarkers identified in fecal metabolic profiles of allo-HSCT group vs CT group. aArea under the receiver operating characteristic (ROC) curve of the biomarkers; bSensitivity and cSpecificity were calculated from the ROC curve

| Name                            | VIP   | FDR       | FC       | AUC   | Sensitivity | Specificity |
|---------------------------------|-------|-----------|----------|-------|-------------|-------------|
| P,P-Dioctyldiphenylamine        | 1,098 | 0.0013207 | 20.238   | 1.0   | 1           | 1           |
| Fumaricacid                     | 1,55  | 0.0012967 | 0.013105 | 1.0   | 1           | 1           |
| Squalene                        | 2,119 | 0.019419  | 0.033063 | 1.0   | 1           | 1           |
| Indole-3-methyl acetate         | 1,245 | 9.4356E-4 | 0.21604  | 1.0   | 1           | 1           |
| Lathosterol                     | 1,189 | 8.0299E-4 | 6.6603   | 1.0   | 1           | 1           |
| Tetracosanoicacid               | 2,085 | 0.0098185 | 0.046407 | 1.0   | 1           | 1           |
| Vitamin E                       | 2,243 | 0.011124  | 0.082115 | 0.998 | 0,99        | 1           |
| Succinicacid                    | 2,227 | 0.012497  | 0.12823  | 0.994 | 0,994       | 1           |
| m-Cresol                        | 2,532 | 0.009682  | 12.958   | 0.978 | 0,956       | 1           |
| Z-8-Methyl-9-tetradecenoic acid | 2,143 | 3.7065E-4 | 9.8334   | 0.937 | 0,874       | 1           |
| 2-Hexenyl valerate              | 4,318 | 1.0586E-4 | 3.5335   | 0.934 | 0,938       | 0,93        |
| Methyl 3-phenylpropanoate       | 1,421 | 3.7674E-4 | 16.671   | 0.933 | 0,866       | 1           |
| Cholestenone                    | 2,402 | 1.5487E-4 | 0.41437  | 0.929 | 0,858       | 1           |
| Phytol                          | 1,587 | 5.9967E-4 | 10.731   | 0.902 | 0,804       | 1           |
| beta-Sitosterol                 | 2,217 | 6.4757E-4 | 0.47736  | 0.877 | 0,854       | 0,9         |
| 3,9-Diethyl-6-tridecanol        | 1,711 | 3.7674E-4 | 10.123   | 0.871 | 0,742       | 1           |
| Cholesterol                     | 2,083 | 0,0043436 | 7.0209   | 0.868 | 0,736       | 1           |
| 5beta-Cholestanone              | 1,961 | 0.001398  | 3.0618   | 0.851 | 0,902       | 0,8         |
| Campesterol                     | 1,549 | 5.0494E-4 | 2.8208   | 0.846 | 0,702       | 0,99        |
| 16-Methylheptadecanoic acid     | 1,774 | 3.5182E-5 | 39.607   | 0.827 | 0,772       | 0,972       |
| Aceticacid                      | 1,899 | 0.0017588 | 3.4924   | 0.789 | 0,63        | 0,948       |
| Lathosterol                     | 3,874 | 0.040879  | 2.2564   | 0.773 | 0,696       | 0,85        |
| 17-Methyloctadecanoic acid      | 1,431 | 0.036001  | 892.23   | 0.745 | 0,592       | 0,898       |
| Indole                          | 5,571 | 0,006894  | 64.862   | 0.759 | 0,638       | 0,88        |

FC: Fold Change;FDR: False Discovery Rates;VIP: The variable importance in the projection; AUC: area under the curve

**Table S8.** Biomarkers identified in fecal metabolic profiles of allo-HSCT group vs CT group. aArea under the receiver operating characteristic (ROC) curve of the biomarkers; bSensitivity and cSpecificity were calculated from the ROC curve

| Name                   | VIP  | FDR       | FC     | AUC   | Sensitivity | Specificity |
|------------------------|------|-----------|--------|-------|-------------|-------------|
| (9Z) -Octadecenoicacid | 3,28 | 8.1257E-4 | 9.2694 | 0.977 | 0,954       | 1,0         |
| Cholesterol            | 1,82 | 0.017742  | 3.2579 | 0.85  | 0,8         | 0,9         |
| campesterol            | 1,65 | 0.025     | 5.0965 | 0,784 | 0,718       | 0,85        |
| Lathosterol            | 1,49 | 0.029516  | 2.2313 | 0,756 | 0,612       | 0,9         |

FC: Fold Change;FDR: False Discovery Rates;VIP: The variable importance in the projection; AUC: area under the curve

**Table S9.** Changes of the metabolites' levels in GvHD and Non-GvHD patients compared to CT group

| Compound                                                  | Non_ GvHD vs CT group | GvHD vs CT group |
|-----------------------------------------------------------|-----------------------|------------------|
| Succinicacid                                              | 0,00038↑              | 0,013↑           |
| 17-Octadecynoic acid                                      | 0,0153↓               | 0,0014↑          |
| 12-Methyltridecanoic acid                                 | 0,0181↓               | 0,0294↑          |
| Methyl 3-phenylpropanoate                                 | 0,0018↓               | 0,026↑           |
| Coprostanol                                               | 8,48E-05↓             | 0,0002↑          |
| Lathosterol                                               | 0,0369↓               | 0,0211↑          |
| Aceticacid                                                | 0,0139↓               | 0,0122↓          |
| Stigmastanol                                              | 0,00016↑              | 0,0002↑          |
| 17-Methyloctadecanoic acid                                | 0,0054↓               | 0,193            |
| Ergosterol                                                | 0,0094↑               | 0,132            |
| 2-Methoxy-4-vinylphenol                                   | 0,0083↓               | 0,0344↑          |
| Squalene                                                  | 0,0003↑               | 0,254            |
| Vitamin E                                                 | 0,0024↓               | 0,0724           |
| Indole-3-methyl acetate                                   | 0,0114↓               | 0,111            |
| 7,9-Di-tert-butyl-1-oxaspiro[4,5]deca-6,9-diene-2,8-dione | 6,71E-05↓             | 0,389            |
| m-Cresol                                                  | 0,0005↓               | 0,0852           |
| 2,4-Di-tert-butylphenol                                   | 0,118                 | 0,033↓           |

↓Significant decrease in Non-GvHD or GvHD patients compared to Healthy controls (p< 0.05) ;

↑ Significant decrease in Non-GvHD or GvHDpatients compared to Healthy controls (p< 0.05).
